# Supplementary material
Source: MDPI journal article supplement (https://www.mdpi.com/2227-9709/8/2/34)
Supplement: s1 [file s1]

## Supplementary Material

**File 1.** Detailed Search Strategies.

### Ovid Medline All

| Set | Searches                                                                                                                                                                                                                                                                                                                                                                  |
|-----|---------------------------------------------------------------------------------------------------------------------------------------------------------------------------------------------------------------------------------------------------------------------------------------------------------------------------------------------------------------------------|
| 1   | ((Participat* adj2 design*) or co-design or (cooperative adj2 design*) or "user involvement").ti,ab,kf. or exp "Stakeholder Participation"/                                                                                                                                                                                                                               |
| 2   | ("health information technology" or "medical informatics" or software or (phone adj2 app) or mhealth or (digital adj1 health*) or games or gaming or gamify* or telehealth or telemedicine).ti,ab,kf. or exp "Medical Informatics"/ or exp "Software Design"/ or exp "Universal Design"/ or exp "Computer-Aided Design"/ or exp mobile applications/ or exp Telemedicine/ |
| 3   | (Stakeholder* or patients or (health* adj1 provider*) or physician* or nurse* or therapist* or caregiver* or famil* or user*).ti,ab,kf. or exp nurses/ or exp nursing staff/ or exp physicians/ or exp Patients/ or exp caregivers/ or exp Family/                                                                                                                        |
| 4   | 1 and 2 and 3                                                                                                                                                                                                                                                                                                                                                             |
| 5   | limit 4 to english language                                                                                                                                                                                                                                                                                                                                               |

### Embase

| Set | Search                                                                                                                                                                                                                                                                                                                                                                                                                                          |
|-----|-------------------------------------------------------------------------------------------------------------------------------------------------------------------------------------------------------------------------------------------------------------------------------------------------------------------------------------------------------------------------------------------------------------------------------------------------|
| #1  | ((participat* NEAR/2 design*):ti,ab,kw) OR 'co design':ti,ab,kw OR ((cooperative NEAR/2 design*):ti,ab,kw) OR 'user involvement':ti,ab,kw OR 'stakeholder engagement'/exp                                                                                                                                                                                                                                                                       |
| #2  | 'health information technology':ti,ab,kw OR 'medical informatics':ti,ab,kw OR software:ti,ab,kw OR ((phone NEAR/2 app):ti,ab,kw) OR mhealth:ti,ab,kw OR ((digital NEAR/1 health*):ti,ab,kw) OR games:ti,ab,kw OR gaming:ti,ab,kw OR telehealth:ti,ab,kw OR telemedicine:ti,ab,kw OR 'medical informatics'/exp OR 'software design'/exp OR 'universal design'/exp OR 'computer aided design'/exp OR 'mobile application'/exp OR 'telehealth'/exp |
| #3  | stakeholder*:ti,ab,kw OR patients:ti,ab,kw OR ((health* NEAR/1 provider*):ti,ab,kw) OR physician*:ti,ab,kw OR nurse*:ti,ab,kw OR therapist*:ti,ab,kw OR caregiver*:ti,ab,kw OR famil*:ti,ab,kw OR user*:ti,ab,kw OR 'nurse'/exp OR 'medical personnel'/exp OR 'patient'/exp OR 'caregiver'/exp OR 'family'/exp                                                                                                                                  |
| #4  | #1 AND #2 AND #3                                                                                                                                                                                                                                                                                                                                                                                                                                |
| #5  | #1 AND #2 AND #3 NOT ([medline]/lim OR [pubmed-not-medline]/lim)                                                                                                                                                                                                                                                                                                                                                                                |
| #6  | 'editorial'/it OR 'erratum'/it OR 'letter'/it OR 'note'/it OR [animal cell]/lim OR [animal experiment]/lim OR [animal model]/lim OR [animal tissue]/lim                                                                                                                                                                                                                                                                                         |
| #7  | #5 NOT #6                                                                                                                                                                                                                                                                                                                                                                                                                                       |
| #8  | #7 AND [english]/lim                                                                                                                                                                                                                                                                                                                                                                                                                            |
| #9  | #8 AND 'conference abstract'/it                                                                                                                                                                                                                                                                                                                                                                                                                 |

### Web of Science

| Set | Search                                                                                                                                             |
|-----|----------------------------------------------------------------------------------------------------------------------------------------------------|
| # 1 | TS=((Participat* near/2 design*) or co-design or (cooperative near/2 design*) or "user involvement") Indexes=SCI-EXPANDED, SSCI Timespan=All years |

|     |                                                                                                                                                                                                                                                                         |
|-----|-------------------------------------------------------------------------------------------------------------------------------------------------------------------------------------------------------------------------------------------------------------------------|
| # 2 | TS=("health information technology" or "medical informatics" or software or (phone near/1 app) or (mobile near/1 app) or mhealth or (digital near/1 health*) or games or gaming or gamify* or telehealth or telemedicine) Indexes=SCI-EXPANDED, SSCI Timespan=All years |
| # 3 | TS=(Stakeholder* or patients or (health* near/1 provider*) or physician* or nurse* or user* or therapist* or caregiver* or famil* or user*) Indexes=SCI-EXPANDED, SSCI Timespan=All years                                                                               |
| # 4 | #3 AND #2 AND #1 Indexes=SCI-EXPANDED, SSCI Timespan=All years                                                                                                                                                                                                          |
| # 5 | (#3 AND #2 AND #1) AND LANGUAGE: (English) Indexes=SCI-EXPANDED, SSCI Timespan=All years                                                                                                                                                                                |
| #6  | (#3 AND #2 AND #1) AND LANGUAGE: (English) Refined by: DOCUMENT TYPES: ( ARTICLE OR PROCEEDINGS PAPER OR REVIEW OR EARLY ACCESS ) Indexes=SCI-EXPANDED, SSCI Timespan=All years                                                                                         |

### Cochrane Library

| Set | Search                                                                                                                                                                                                                                                                                                                                                              |
|-----|---------------------------------------------------------------------------------------------------------------------------------------------------------------------------------------------------------------------------------------------------------------------------------------------------------------------------------------------------------------------|
| #1  | ((Participat* near/2 design*) or co-design or (cooperative near/2 design*) or "user involvement"):ti,ab,kw or [mh "Stakeholder Participation"]                                                                                                                                                                                                                      |
| #2  | ("health information technology" or "medical informatics" or software or (phone near/2 app) or mhealth or (digital near/1 health*) or games or gaming or telehealth or telemedicine):ti,ab,kw or [mh "Medical Informatics"] OR [mh "Software Design"] OR [mh "Universal Design"] OR [mh "Computer-Aided Design"] or [mh "mobile applications"] or [mh Telemedicine] |
| #3  | (Stakeholder* or patients or (health* near/1 provider*) or physician* or nurse* or therapist* or caregiver* or famil* or user*):ti,ab,kw or [mh nurses] or [mh "nursing staff"] or [mh physicians] or [mh Patients] or [mh caregivers] or [mh Family]                                                                                                               |
| #4  | #1 and #2 and #3                                                                                                                                                                                                                                                                                                                                                    |
